# Supplementary material
Source: PubMed Central journal article supplement (PMC11208084)
Supplement: NIHMS1996093-supplement-Supplementary_Tables_1-3.pdf [file NIHMS1996093-supplement-Supplementary_Tables_1-3.pdf]

ONLINE ONLY

## Supplemental material

### Identification of risk factors associated with leptomeningeal disease after resection of brain metastases

Morshed et al.

<https://thejns.org/doi/abs/10.3171/2022.12.JNS221490>

**DISCLAIMER** The *Journal of Neurosurgery* acknowledges that the following section is published verbatim as submitted by the authors and did not go through either the *Journal's* peer-review or editing process.

**Supplemental Table 1.** Variables used for random forest models and number of missing data points for each variable

| Variables                                                                         |
|-----------------------------------------------------------------------------------|
| 1) Age (N=0 missing)                                                              |
| 2) Sex (Male/Female) (N=0 missing)                                                |
| 3) Minority Status (Minority/Non-minority) (N=1 missing)                          |
| 4) Cancer Type (NSCLC/Melanoma/Breast/Gyn/RCC/Urothelial) (N=0 missing)           |
| 5) Location (Frontal/Parietal/Temporal/Occipital/Insula/Cerebellum) (N=0 missing) |
| 6) Extracranial Disease Status (Present/Absent) (N=0 missing)                     |
| 7) Tumor Side (N=0 missing)                                                       |
| 8) Tumor Volume (N=3 missing)                                                     |
| 9) Time from BM diagnosis to surgery (N=0 missing)                                |
| 10) No. of BM resected at Surgery (N=0 missing)                                   |
| 11) No. of total BM at Surgery (N=0 missing)                                      |
| 12) Additional Craniotomies (Yes/No) (N=0 missing)                                |
| 13) BM Hemorrhage (Yes/No) (N=1 missing)                                          |
| 14) Cystic Tumor (Yes/No) (N=4 missing)                                           |
| 15) Contact with Cortical Surface (Yes/No) (N=5 missing)                          |
| 16) Contact with Ventricle (Yes/No) (N=5 missing)                                 |
| 17) Extent of Resection (GTR/STR) (N=1 missing)                                   |
| 18) Preop RT (Yes/No) (N=0 missing)                                               |
| 19) Postop RT Type (Focal RT/WBRT) (N=1 missing)                                  |
| 20) Postop WBRT Prior to LMD Diagnosis (Yes/No) (N=1 missing)                     |
| 21) CPI Tx before Surgery (Yes/No) (N=0 missing)                                  |
| 22) CPI Tx after Surgery (Yes/No) (N=0 missing)                                   |
| 23) Other targeted tx before surgery (Yes/No) (N=0 missing)                       |
| 24) Other targeted tx after surgery (Yes/No) (N=0 missing)                        |
| 25) Any systemic therapy postop (Yes/No) (N=0 missing)                            |

**Supplemental Table 2.** Univariate and multivariate nominal regression analyses examining factors associated with leptomeningeal disease

|                                                 | Univariate        |         | Multivariate      |         |
|-------------------------------------------------|-------------------|---------|-------------------|---------|
|                                                 | OR (95% CI)       | p-value | OR (95% CI)       | p-value |
| Age                                             | 0.65 (0.16-2.66)  | 0.55    |                   |         |
| Male (vs Female)                                | 0.59 (0.29-1.19)  | 0.14    |                   |         |
| Minority (vs White non-Hispanic)                | 2.05 (1.04-4.05)  | 0.038   | 1.66 (0.75-3.71)  | 0.21    |
| Cancer Type (Breast/Gyn/Urothelial vs Other)    | 3.06 (1.57-5.96)  | 0.001   | 1.20 (0.52-2.76)  | 0.67    |
| Tumor Side                                      | 1.30 (0.67-2.51)  | 0.44    |                   |         |
| Location (Cerebellum/Insula/Occipital vs Other) | 3.43 (1.76-6.69)  | 0.0003  | 4.54 (2.02-10.19) | 0.0002  |
| Absence of Extracranial disease                 | 3.24 (1.65-6.34)  | 0.0006  | 4.17 (1.81-9.57)  | 0.0008  |
| Tumor Volume                                    | 5.53 (0.82-37.36) | 0.08    | 9.70 (0.94-99.66) | 0.056   |
| Time from BM diagnosis to surgery               | 1.20 (0.17-8.44)  | 0.86    |                   |         |
| No. of total BM at Surgery                      | 0.52 (0.07-3.62)  | 0.51    |                   |         |
| No. of BM resected at Surgery (2 vs 1)          | 2.25 (0.52-9.78)  | 0.28    |                   |         |
| Additional Craniotomies                         | 1.48 (0.69-3.16)  | 0.31    |                   |         |
| BM Hemorrhage                                   | 0.55 (0.28-1.08)  | 0.08    | 0.94 (0.42-2.08)  | 0.88    |
| Cystic Tumor                                    | 1.07 (0.49-2.30)  | 0.87    |                   |         |
| Contact with Cortical Surface                   | 1.44 (0.70-2.94)  | 0.32    |                   |         |
| Contact with Ventricle                          | 2.63 (1.27-5.46)  | 0.01    | 2.21 (0.95-5.14)  | 0.067   |
| GTR vs STR                                      | 0.95 (0.44-2.04)  | 0.89    |                   |         |
| Prior Intracranial RT                           | 1.18 (0.47-2.95)  | 0.73    |                   |         |
| Immediate Postop Focal RT vs WBRT               | 1.41 (0.51-3.92)  | 0.51    |                   |         |
| WBRT Prior to LMD Diagnosis                     | 1.00 (0.45-2.20)  | 0.99    |                   |         |
| CPI Tx before Surgery                           | 0.84 (0.27-2.62)  | 0.76    |                   |         |
| CPI Tx after Surgery                            | 1.39 (0.62-3.10)  | 0.43    |                   |         |
| Other targeted tx before surgery                | 1.43 (0.71-2.89)  | 0.32    |                   |         |
| Other targeted tx after surgery                 | 0.99 (0.52-1.91)  | 0.99    |                   |         |
| Any systemic therapy postop                     | 1.03 (0.50-2.12)  | 0.94    |                   |         |

BM: brain metastasis, CPI: checkpoint inhibitor, GTR: gross total resection, LMD: leptomeningeal disease, RT: radiotherapy, STR: subtotal resection, WBRT: whole brain radiotherapy

**Supplemental Table 3.** Nominal regression analysis examining factors associated with cLMD versus nLMD (N=47 patients)

|                                                 | Univariate         |         |
|-------------------------------------------------|--------------------|---------|
|                                                 | cLMD vs nLMD       | p-value |
| Age                                             | 1.17 (0.11-12.39)  | 0.90    |
| M (vs F)                                        | 0.89 (0.24-3.31)   | 0.87    |
| Minority (vs White non-Hispanic)                | 1.12 (0.34-3.68)   | 0.85    |
| Cancer Type (Breast/Gyn/Urothelial vs Other)    | 0.96 (0.30-3.09)   | 0.95    |
| Tumor Side (Right vs Left)                      | 0.84 (0.25-2.83)   | 0.78    |
| Location (Cerebellum/Insula/Occipital vs Other) | 1.03 (0.32-3.35)   | 0.96    |
| Absence of Extracranial disease                 | 0.95 (0.28-3.20)   | 0.94    |
| Tumor Volume                                    | 1.08 (0.07-15.81)  | 0.95    |
| Time from BM diagnosis to surgery               | 1.56 (0.17-14.33)  | 0.69    |
| No. of total BM at Surgery                      | 2.94 (0.21-41.19)  | 0.42    |
| No. of BM resected at Surgery (2 vs 1)          | 0.72 (0.06-8.58)   | 0.80    |
| Additional Craniotomies                         | 1.07 (0.28-4.06)   | 0.92    |
| BM Hemorrhage                                   | 2.18 (0.63-7.61)   | 0.22    |
| Cystic Tumor                                    | 1.25 (0.32-4.90)   | 0.75    |
| Contact with Cortical Surface                   | 3.14 (0.73-13.5)   | 0.12    |
| Contact with Ventricle                          | 0.78 (0.23-2.72)   | 0.70    |
| GTR vs STR                                      | 1.25 (0.31-5.05)   | 0.75    |
| Preop RT                                        | 2.22 (0.44-11.32)  | 0.34    |
| Immediate Postop Focal RT vs WBRT               | 0.43 (0.06-2.84)   | 0.38    |
| WBRT Prior to LMD Diagnosis                     | 1.57 (0.38-6.43)   | 0.53    |
| CPI Tx before Surgery                           | 1.53 (0.20-11.92)  | 0.69    |
| CPI Tx after Surgery                            | 2.14 (0.49-9.33)   | 0.31    |
| Other targeted tx before surgery                | 2.18 (0.63-7.61)   | 0.22    |
| Other targeted tx after surgery                 | 2.48 (0.75-8.17)   | 0.14    |
| Any systemic therapy postop                     | 13.5 (1.58-115.70) | 0.02    |
